# Supplementary figures and images for: Co-delivery of siRNA and doxorubicin to cancer cells from additively manufactured implants
Source: Royal Society of Chemistry journal article supplement (doi:10.1039/c5ra23748c), 2015-01-01

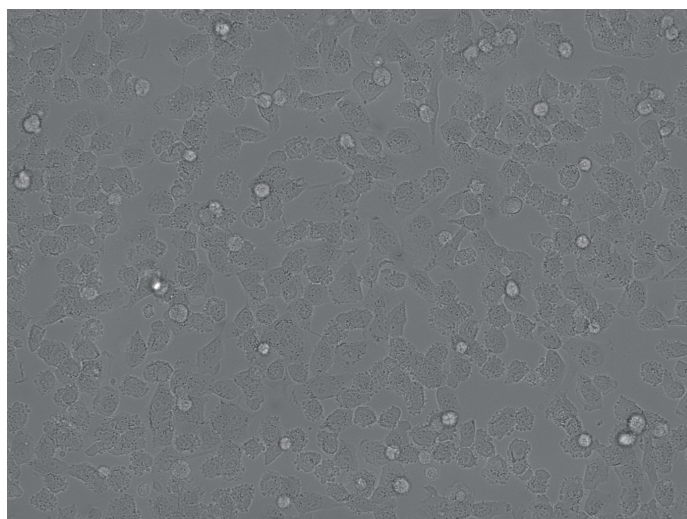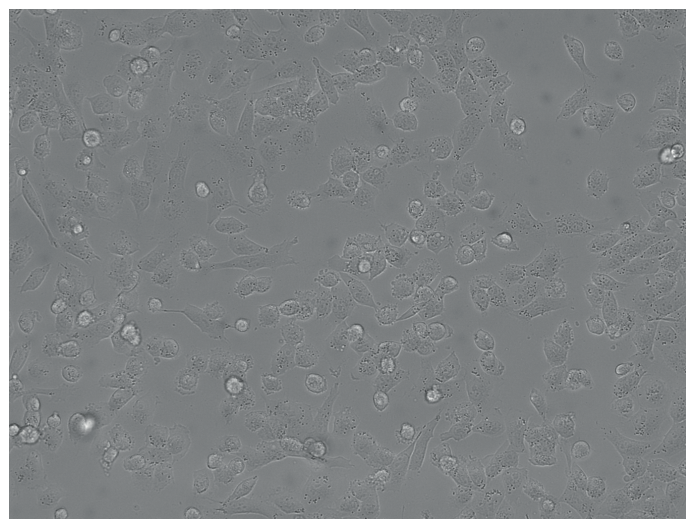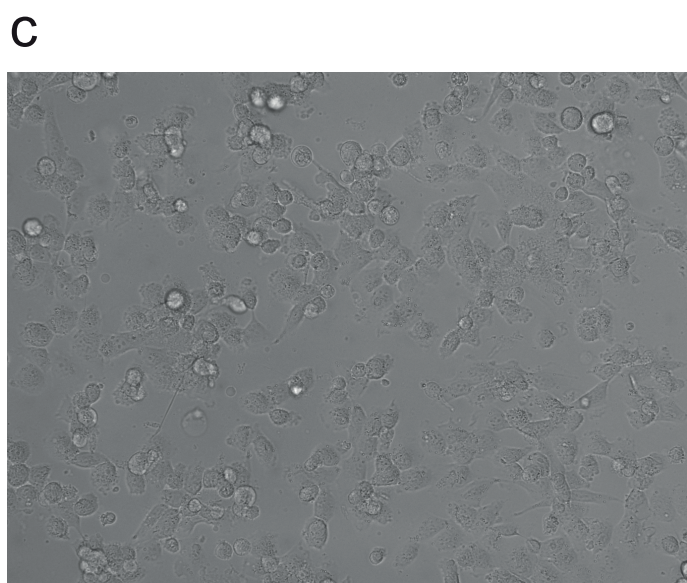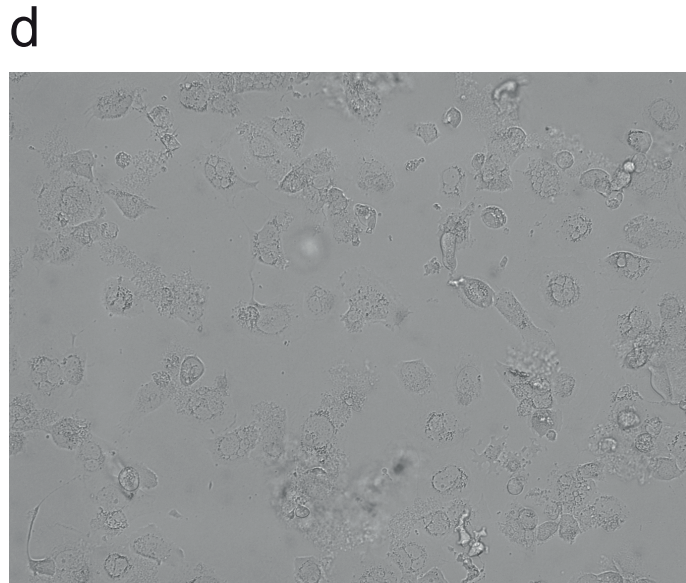

Supplement: c5ra23748c1.pdf [file c5ra23748c1.pdf]
